# Supplementary material for: A study of artificial speech quality assessors of VoIP calls subject to limited bursty packet losses
Source: Springer Nature journal article supplement (doi:10.1186/1687-5281-2011-9), 2011-09-23
Supplement: 13640_2010_9_MOESM3_ESM.pdf [file 13640_2010_9_MOESM3_ESM.pdf]

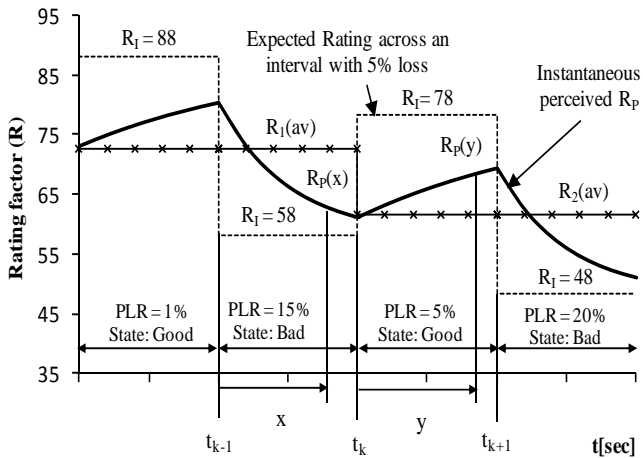

### Notation

$R(av)$ : A score given at the end of a good and the next bad period

$R_i$ : An intermediate score given at the end of short interval, e.g., 2 – 5 sec.

$R_p$ : A score given instantaneously, e.g., every 500 ms
