# Supplementary material for: A study of artificial speech quality assessors of VoIP calls subject to limited bursty packet losses
Source: Springer Nature journal article supplement (doi:10.1186/1687-5281-2011-9), 2011-09-23
Supplement: 13640_2010_9_MOESM6_ESM.pdf [file 13640_2010_9_MOESM6_ESM.pdf]

Experienced pattern of packet loss process

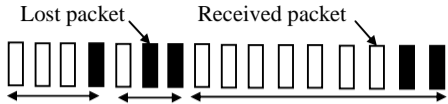

**Legend**

- $G_i$ : Gap duration of  $i^{\text{th}}$  pair
- $B_i$ : Burst duration of  $i^{\text{th}}$  pair
- $MOS_P^i(G_i, B_i)$ : The MOS score attributed to  $i^{\text{th}}$  pair, that refers to the perceived quality following the periodic application of  $(G_i, B_i)$  pattern

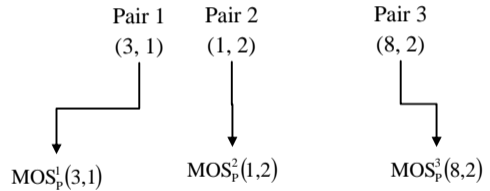

$$MOS = \frac{\sum_i (G_i/10) MOS_P^i(G_i, B_i)}{\sum_i (G_i/10)}$$
