# Supplementary material for: A study of artificial speech quality assessors of VoIP calls subject to limited bursty packet losses
Source: Springer Nature journal article supplement (doi:10.1186/1687-5281-2011-9), 2011-09-23

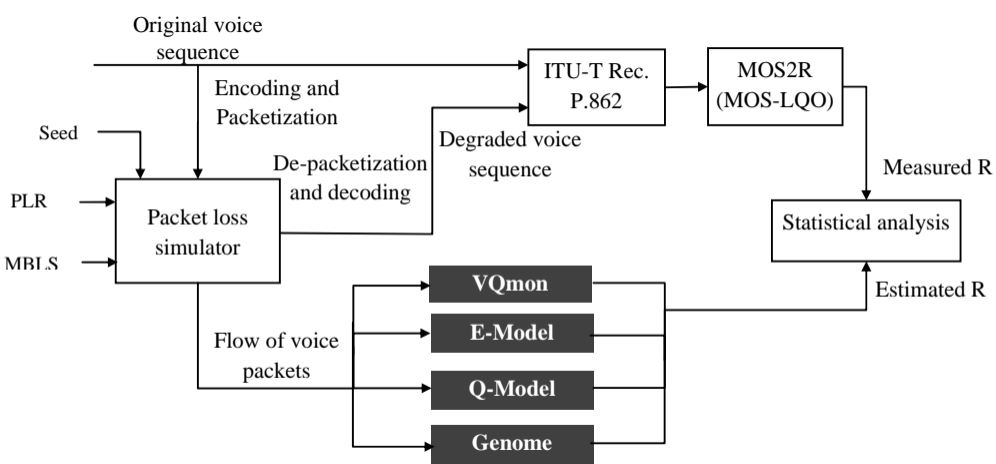

Supplement: 13640_2010_9_MOESM8_ESM.pdf [file 13640_2010_9_MOESM8_ESM.pdf]
